# Supplementary material for: Enhancement of cumulative photoirradiated and ac magnetic-field induced cancer (HeLa) cell killing efficacy of mixed α and γ-Fe2O3 magnetic nanoparticles
Source: Royal Society of Chemistry journal article supplement (doi:10.1039/c2nj40029d), 2012-01-01
Supplement: c2nj40029d.pdf [file c2nj40029d.pdf]

## Enhancement of cumulative photoirradiated and AC magnetic-field induced cancer (HeLa) cell killing efficacy of mixed $\alpha$ and $\gamma$ -Fe<sub>2</sub>O<sub>3</sub> magnetic nanoparticles

Md. Shariful Islam<sup>a</sup>, Yoshihumi Kusumoto<sup>\*a</sup>, Md. Abdulla-Al-Mamun<sup>a</sup>, Yuji Horie<sup>b</sup> and Hirotaka Manaka<sup>b</sup>

### Supporting information data

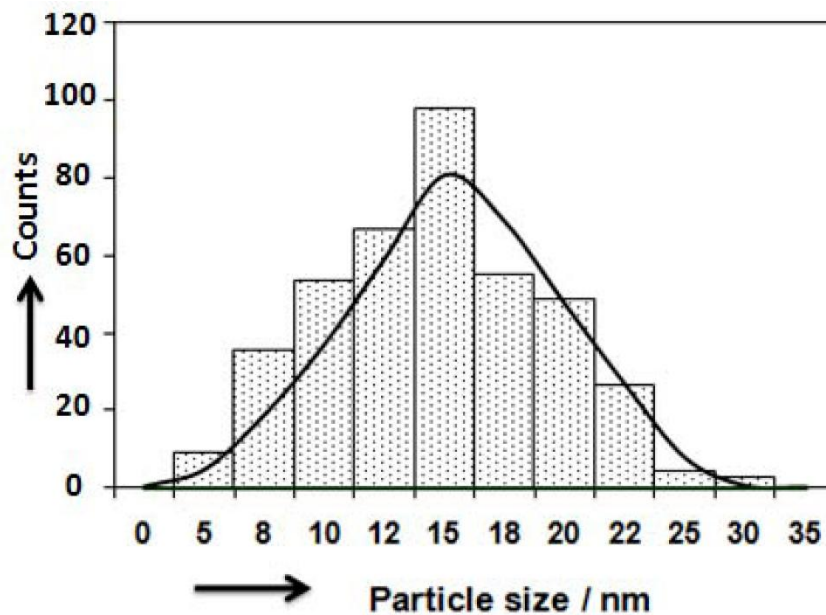

**Fig. S1.** Particle size distribution of as-prepared mixed  $\alpha$  and  $\gamma$ -Fe<sub>2</sub>O<sub>3</sub> nanoparticles measured from TEM analysis.

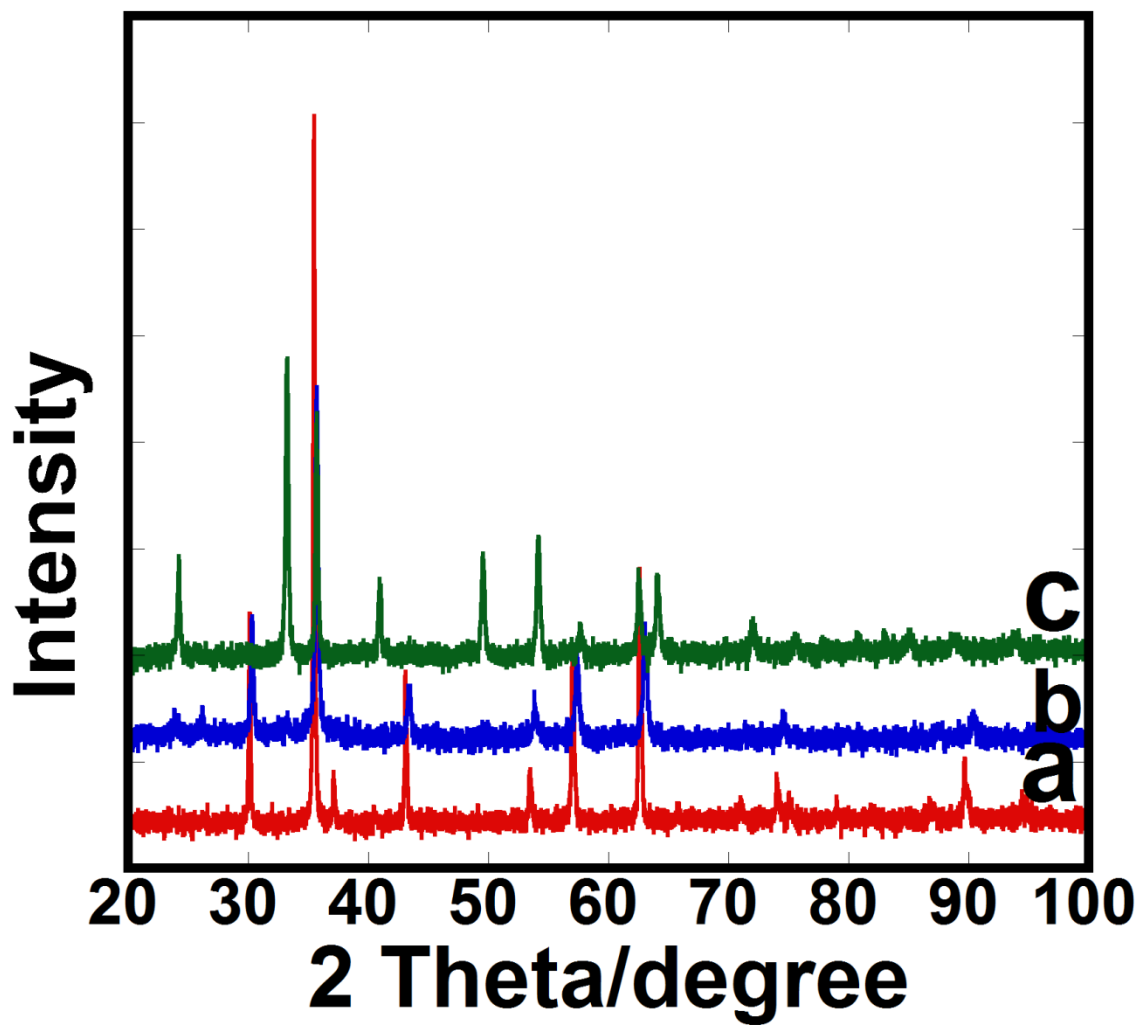

**Fig. S2** XRD patterns of commercial  $\text{Fe}_3\text{O}_4$  (a),  $\gamma\text{-Fe}_2\text{O}_3$  (b) and  $\alpha\text{-Fe}_2\text{O}_3$  (a) nanoparticles (Wako, catalog No: 093-01035, 324-94282 and 322-94283, respectively).

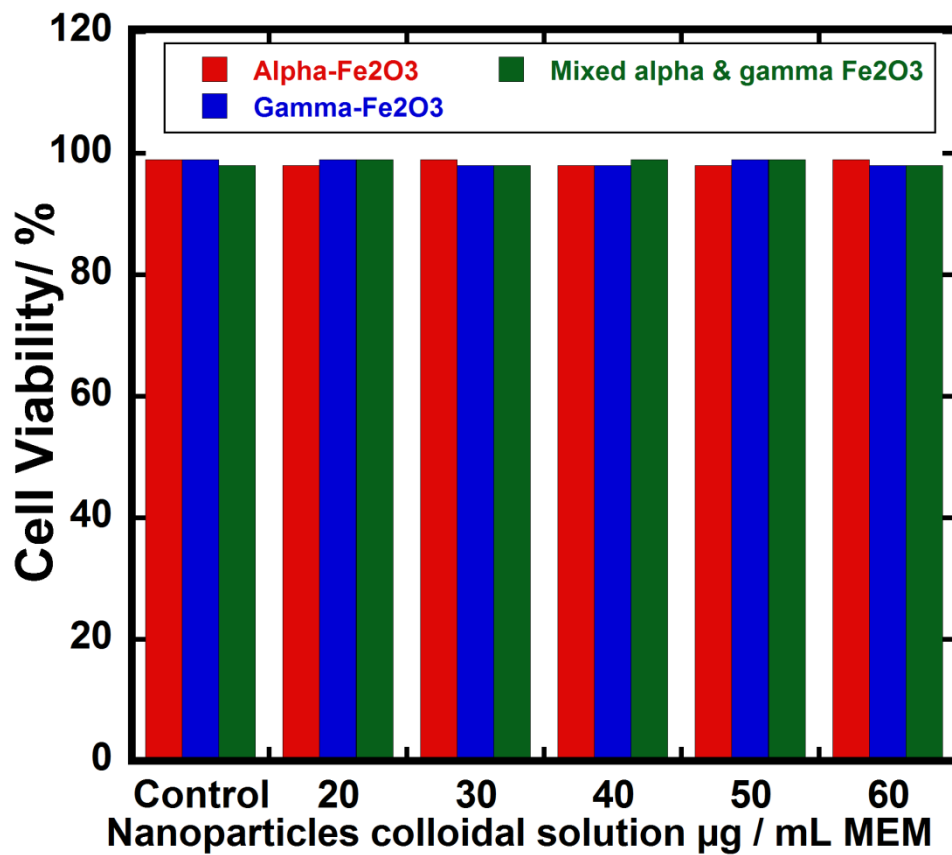

**Fig. S2** Toxic effect of bare  $\alpha$ -Fe<sub>2</sub>O<sub>3</sub>, bare  $\gamma$ -Fe<sub>2</sub>O<sub>3</sub> and mixed  $\alpha$ - and  $\gamma$ -Fe<sub>2</sub>O<sub>3</sub> nanoparticles in HeLa cancer cells without exposing any external energy.
